# Supplementary material for: Microscopy examination of red blood and yeast cell agglutination induced by bacterial lectins
Source: PubMed Central journal article supplement (PMC6657890; doi:10.1371/journal.pone.0220318), 2019-07-25
Supplement: pone.0220318.s001.pdf [file pone.0220318.s001.pdf]

RBC 5%

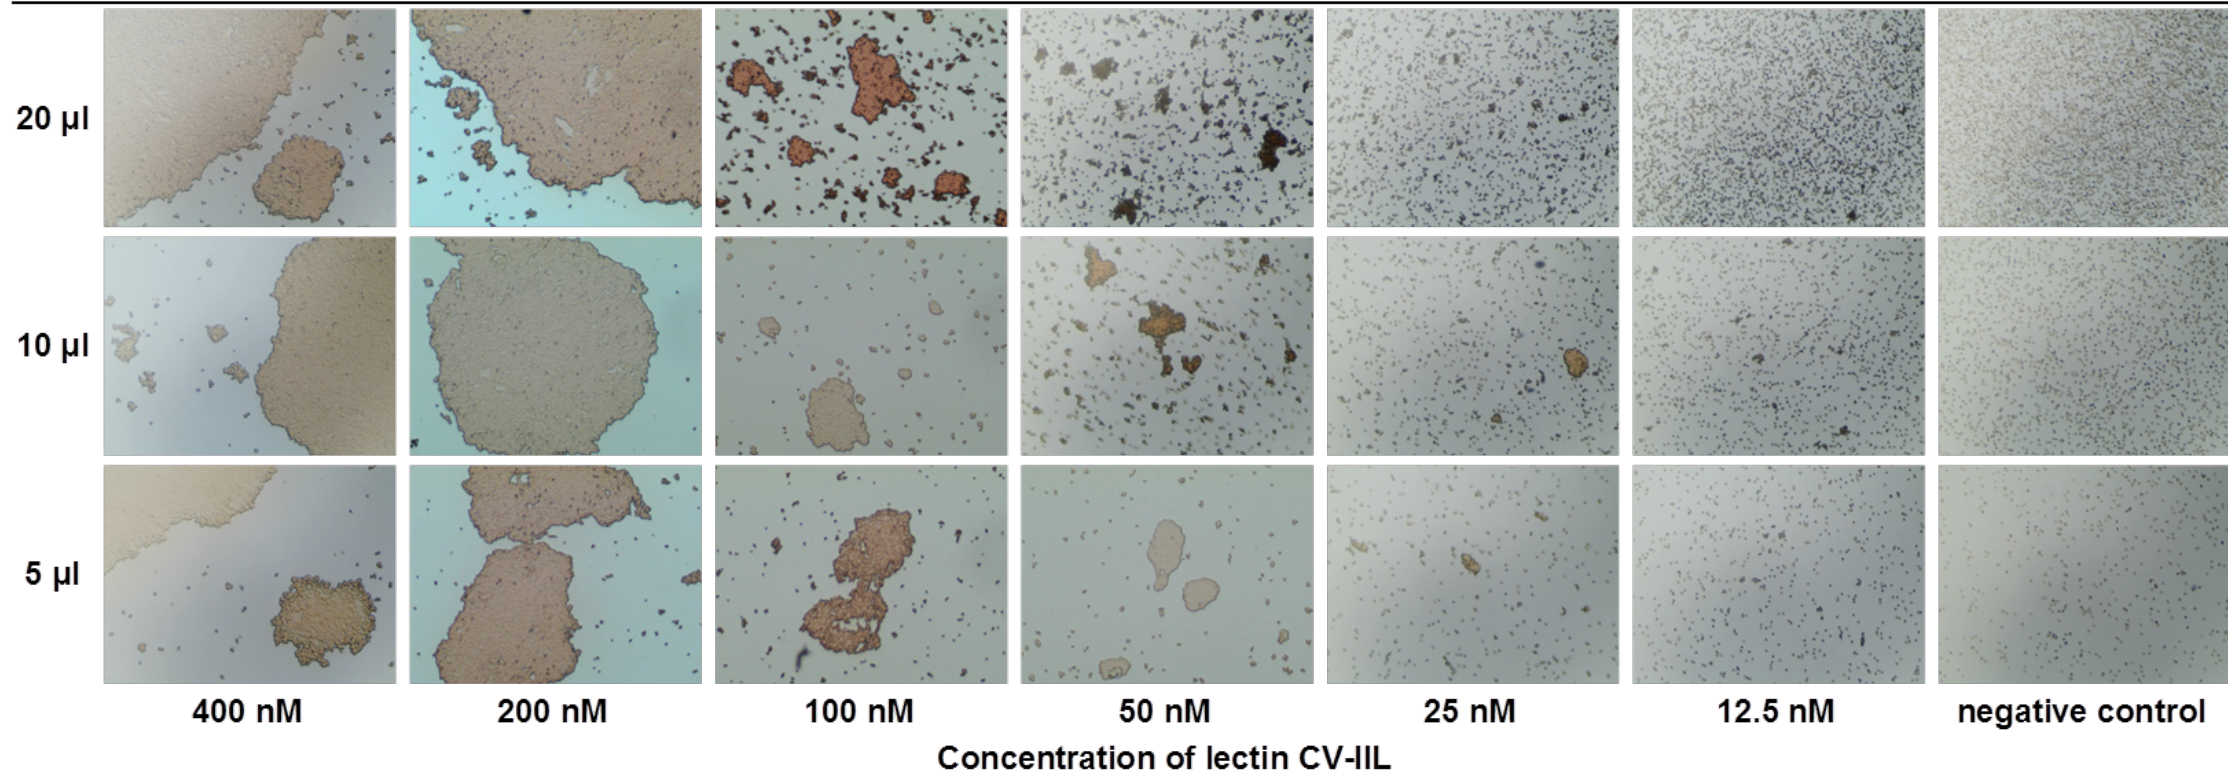

RBC 10%

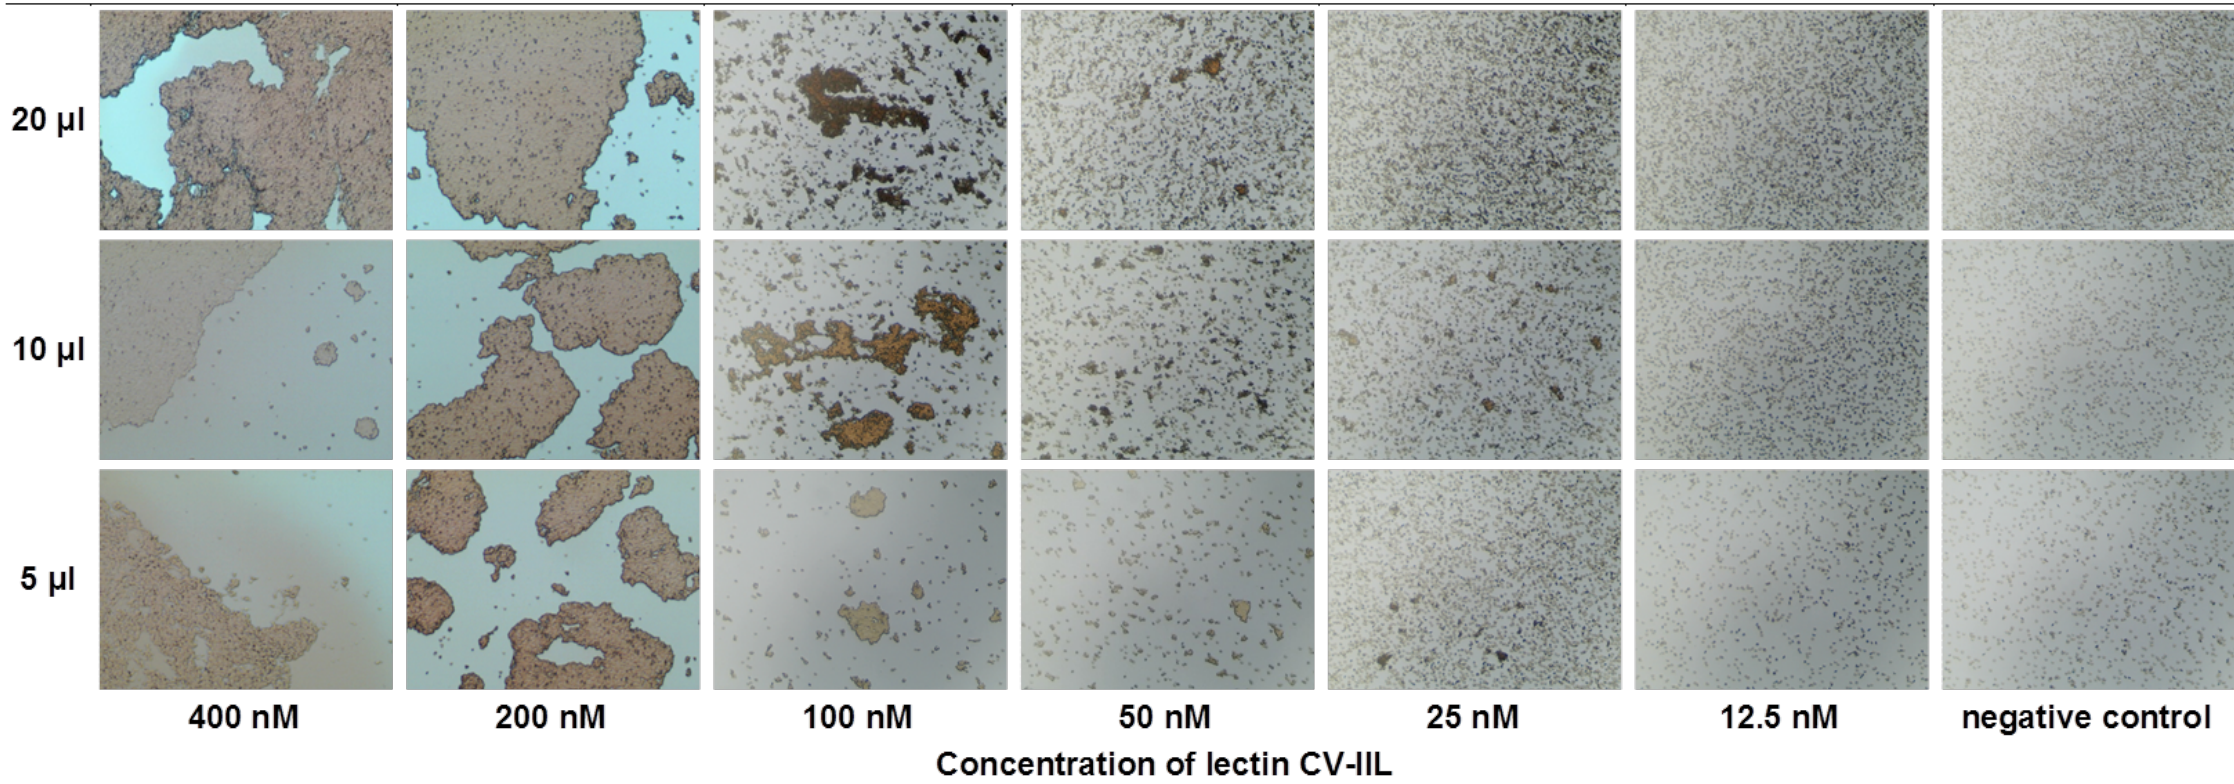



RBC 20%

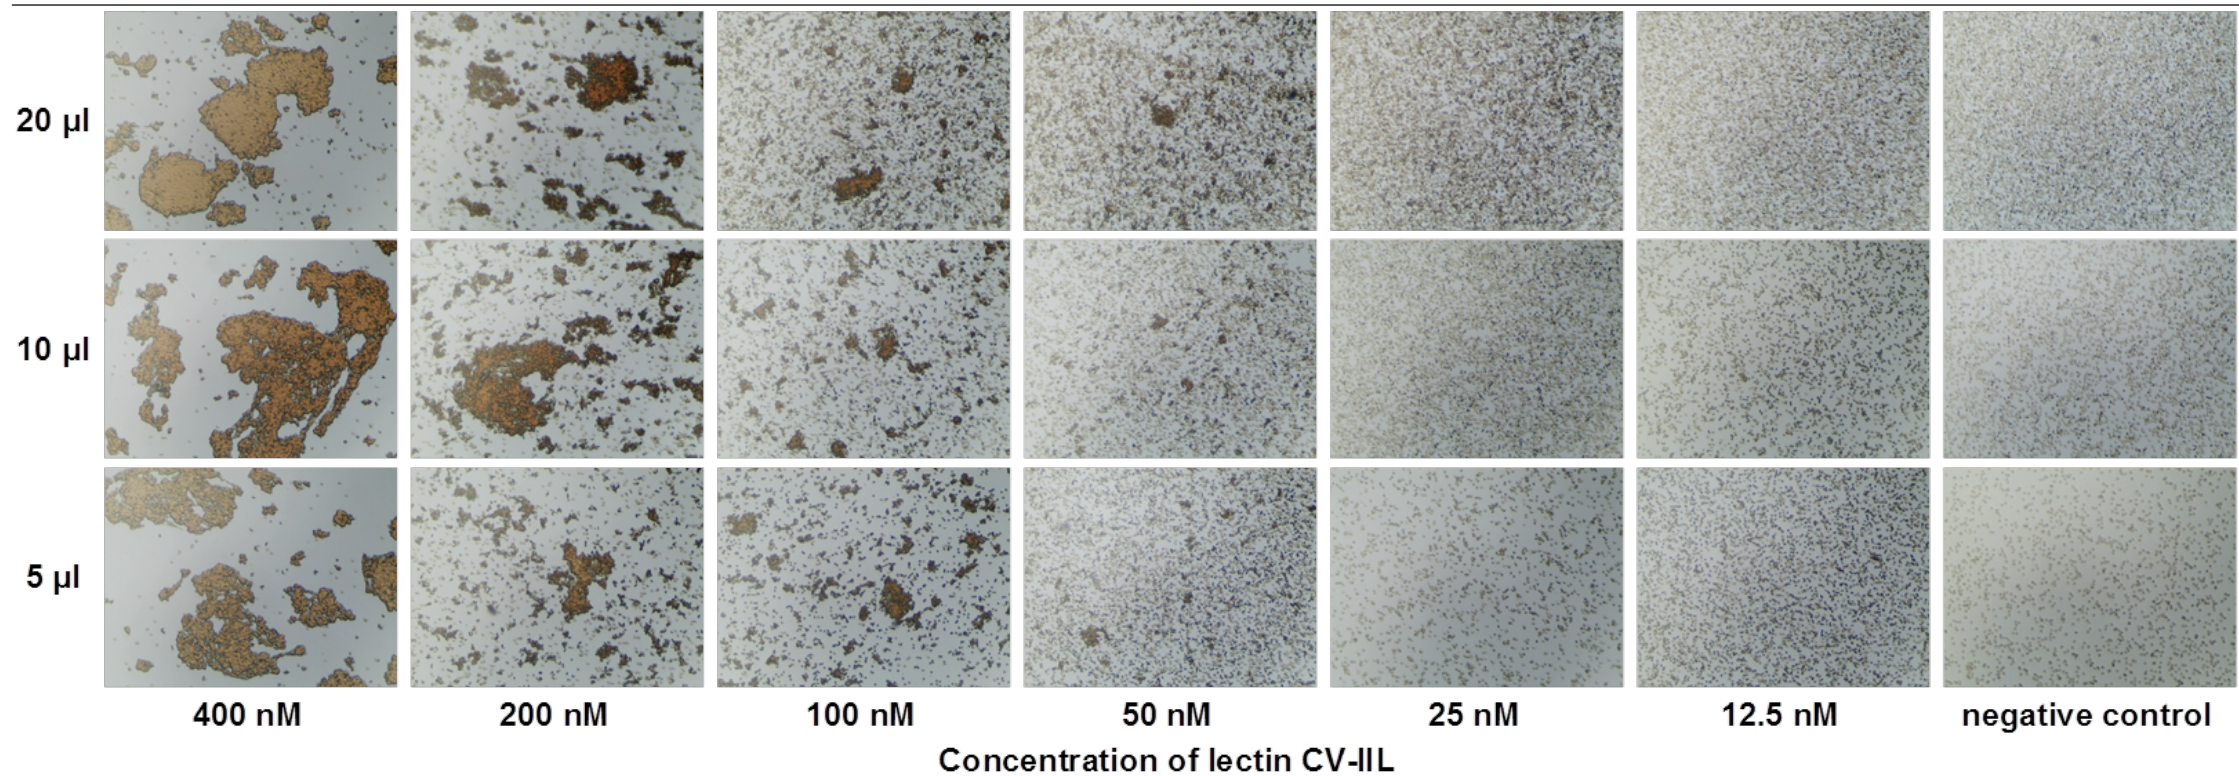

**Fig. S1.** Optimization of RBC concentration used in the agglutination procedure and volume of mixture applied to a glass slide before observation under microscope. Lectin CV-IIL was utilized in this optimization process. The lectin was serially diluted in working buffer and sample of each concentration was mixed in 1 : 1 ratio with suspensions of 5% RBC<sub>0</sub><sup>+</sup> (upper panel) or 10% RBC<sub>0</sub><sup>+</sup> (middle panel) or 20% RBC<sub>0</sub><sup>+</sup> (lower panel). Mixture was incubated for 5 minutes at room temperature and mixed again. Three samples of each mixture in volumes 20  $\mu$ l, 10  $\mu$ l and 5  $\mu$ l were applied to three glass slides and observed under the Levenhuk microscope. Pictures were taken by the camera DEM135 (Levenhuk). RBC hemolysis is apparent in mixtures of 5% RBC or 10% RBC with lectin CV-IIL in concentration 400 nM. All negative control experiments did not show any visible agglutination.
